# Supplementary material
Source: PubMed Central journal article supplement (PMC7554154)
Supplement: NIHMS1614169-supplement-Supplementary.pdf [file NIHMS1614169-supplement-Supplementary.pdf]

# **Efficacy and Safety of Low Dose Rivaroxaban in Patients with Coronary Heart Disease: Systematic Review and Meta-Analysis**

Safi U. Khan, MD; Muhammad Zia Khan, MD; Zain Ul Abideen Asad, MD; Shahul Valavoor, MD; Muhammad Usman Khan, MD; Muhammad Shahzeb Khan, MD; Troy Krupica, MD; Mohamad Alkhouli, MD; Edo Kaluski, MD

## **SUPPLEMENTAL MATERIAL**

**Table S1. PubMed search strategy**

|                                                                                                                                                                                                                                                                                                                                                                                                                                                                                                                                                                                                                                                                                                                                           |     |
|-------------------------------------------------------------------------------------------------------------------------------------------------------------------------------------------------------------------------------------------------------------------------------------------------------------------------------------------------------------------------------------------------------------------------------------------------------------------------------------------------------------------------------------------------------------------------------------------------------------------------------------------------------------------------------------------------------------------------------------------|-----|
| ("rivaroxaban"[MeSH Terms] OR "rivaroxaban"[All Fields]) AND (("mortality"[Subheading] OR "mortality"[All Fields] OR "mortality"[MeSH Terms]) OR ("cardiovascular diseases"[MeSH Terms] OR ("cardiovascular"[All Fields] AND "diseases"[All Fields]) OR "cardiovascular diseases"[All Fields] OR ("cardiovascular"[All Fields] AND "disease"[All Fields]) OR "cardiovascular disease"[All Fields]) OR ("myocardial infarction"[MeSH Terms] OR ("myocardial"[All Fields] AND "infarction"[All Fields]) OR "myocardial infarction"[All Fields]) AND ("hemorrhage"[MeSH Terms] OR "hemorrhage"[All Fields] OR "bleeding"[All Fields]) OR ("stroke"[MeSH Terms] OR "stroke"[All Fields])) AND (Clinical Trial[ptyp] AND "humans"[MeSH Terms]) | 231 |
|-------------------------------------------------------------------------------------------------------------------------------------------------------------------------------------------------------------------------------------------------------------------------------------------------------------------------------------------------------------------------------------------------------------------------------------------------------------------------------------------------------------------------------------------------------------------------------------------------------------------------------------------------------------------------------------------------------------------------------------------|-----|

**Table S2. Risk of bias in the included trials as assessed by the Cochrane risk of bias assessment scale**

| Studies             | Randomization | Allocation concealment | Blinding (Physician/Patient) | Adjudication of outcomes | Selective outcome reporting | Incomplete data reporting addressed ? | Free of other bias ? |
|---------------------|---------------|------------------------|------------------------------|--------------------------|-----------------------------|---------------------------------------|----------------------|
| ATLAS ACS-TIMI 46   | Green         | Green                  | Green                        | Green                    | Yellow                      | Green                                 | Yellow               |
| ATLAS ACS 2 TIMI 51 | Green         | Green                  | Green                        | Green                    | Green                       | Yellow                                | Yellow               |
| COMPASS             | Green         | Green                  | Green                        | Green                    | Green                       | Green                                 | Yellow               |
| GEMINI ACS-1        | Green         | Green                  | Green                        | Green                    | Green                       | Green                                 | Yellow               |
| COMMANDER HF        | Green         | Green                  | Green                        | Red                      | Yellow                      | Green                                 | Yellow               |

Green (low risk); yellow (unclear risk); Red (high risk)
